# Supplementary material for: Repurposing of World-Approved Drugs for Potential Inhibition against Human Carbonic Anhydrase I: A Computational Study
Source: MDPI journal article supplement (doi:10.3390/ijms241612619), 2023-08-09
Supplement: s1 [file s1]

Supplementary Materials for

# **Repurposing of World-Approved Drugs for Potential Inhibition against Human Carbonic Anhydrase I: A Computational Study**

**Nannan Zheng<sup>1</sup>, Wanyun Jiang<sup>1</sup>, Puyu Zhang<sup>1</sup>, Le Ma<sup>1</sup>, Junzhao Chen<sup>1</sup> and Haiyang Zhang<sup>1,\*</sup>**

<sup>1</sup> Department of Biological Science and Engineering, School of Chemistry and Biological Engineering, University of Science and Technology Beijing, 100083 Beijing, China

\* Correspondence: zhanghy@ustb.edu.cn

**Table S1.** Toxicity prediction of the existing ligand in complex with hCA I in the PDB database

| Residue name | PDB ID | $q$ | $\Delta E_{\text{dock}}$ | Toxicity |         |        |         |       |
|--------------|--------|-----|--------------------------|----------|---------|--------|---------|-------|
|              |        |     |                          | dili     | carcino | immuno | mutagen | cyto  |
| 949          | 5GMM   | 0   | -9.0                     | N(53)    | N(62)   | N(89)  | N(70)   | N(67) |
| TOR          | 3LXE   | 0   | -8.5                     | N(66)    | N(52)   | N(84)  | Y(52)   | N(72) |
| GZE          | 6I0J   | 0   | -8.5                     | Y(57)    | N(61)   | N(55)  | N(62)   | N(70) |
| V14          | 5E2M   | 0   | -8.2                     | N(72)    | N(72)   | N(98)  | N(72)   | N(64) |
| BZE          | 6EVR   | 0   | -8.1                     | N(78)    | N(65)   | N(99)  | N(76)   | N(63) |
| IWE          | 7ZL5   | 0   | -8.0                     | N(59)    | N(53)   | N(95)  | N(69)   | N(62) |
| N19          | 6EX1   | 0   | -8.0                     | N(80)    | N(64)   | N(99)  | N(80)   | N(61) |
| D3B          | 6FAF   | 0   | -8.0                     | Y(54)    | N(58)   | N(99)  | N(78)   | N(78) |
| 3UG          | 4WUQ   | 0   | -8.0                     | N(66)    | N(58)   | N(99)  | N(81)   | N(69) |
| CJK          | 6F3B   | 0   | -7.7                     | N(59)    | N(64)   | N(99)  | N(79)   | N(72) |
| O5N          | 6XZY   | 0   | -7.7                     | N(65)    | N(73)   | N(90)  | N(78)   | N(68) |
| EON          | 6FAG   | 0   | -7.6                     | Y(57)    | N(57)   | N(88)  | N(73)   | N(82) |
| O5H          | 6XZX   | 0   | -7.5                     | N(70)    | N(69)   | N(99)  | N(81)   | N(64) |
| 84Z          | 7Q0D   | 0   | -7.4                     | N(65)    | N(67)   | N(99)  | N(75)   | N(70) |
| O4Z          | 6XZE   | 0   | -7.3                     | N(65)    | N(73)   | N(93)  | N(78)   | N(68) |
| O5K          | 6XZS   | 0   | -7.2                     | N(64)    | N(72)   | N(97)  | N(82)   | N(68) |
| 3TV          | 4WR7   | 0   | -7.1                     | N(75)    | N(66)   | N(98)  | N(69)   | N(78) |
| O55          | 6XZO   | 0   | -7.0                     | N(65)    | N(66)   | Y(62)  | N(74)   | N(65) |
| 7TI          | 7PLF   | 0   | -6.9                     | N(74)    | N(65)   | N(95)  | N(75)   | N(76) |
| FLB          | 3W6I   | 0   | -6.8                     | N(84)    | N(53)   | N(86)  | N(76)   | N(78) |
| O5T          | 6Y00   | 0   | -6.7                     | N(65)    | N(66)   | Y(63)  | N(74)   | N(65) |
| M25          | 2NMX   | 0   | -6.7                     | N(82)    | N(73)   | N(99)  | N(79)   | N(75) |
| M29          | 2NN7   | 0   | -6.6                     | N(72)    | N(64)   | N(99)  | N(69)   | N(74) |
| M28          | 2NN1   | 0   | -6.4                     | N(71)    | N(67)   | N(99)  | N(73)   | N(67) |
| AZM          | 3W6H   | 0   | -6.3                     | N(56)    | Y(51)   | N(99)  | N(85)   | N(54) |
| MZM          | 1BZM   | 0   | -6.3                     | N(81)    | Y(50)   | N(99)  | N(70)   | N(64) |
| AZM          | 1AZM   | 0   | -5.9                     | N(56)    | Y(51)   | N(99)  | N(85)   | N(54) |

|     |      |    |      |       |       |       |       |       |
|-----|------|----|------|-------|-------|-------|-------|-------|
| 3UF | 4WUP | 0  | -5.7 | N(82) | N(65) | N(99) | N(72) | N(75) |
| FO9 | 6G3V | 0  | -5.7 | N(69) | Y(58) | N(99) | N(64) | N(54) |
| AAS | 1CZM | 0  | -5.6 | N(61) | N(62) | N(91) | N(80) | N(72) |
| GZH | 6I0L | 0  | -5.5 | N(64) | N(77) | N(91) | N(82) | N(77) |
| HIS | 2FW4 | 1  | -5.2 | N(67) | N(80) | N(99) | N(66) | N(71) |
| PPF | 2IT4 | 0  | -4.3 | N(94) | N(59) | N(99) | N(84) | N(70) |
| EDO | 1JV0 | 0  | -3.2 | N(98) | N(86) | N(99) | N(94) | N(82) |
| BCT | 1HCB | -1 | -3.1 | N(91) | N(63) | N(99) | N(88) | N(79) |
| EDO | 1J9W | 0  | -1.7 | N(98) | N(86) | N(99) | N(94) | N(82) |

**Table S2.** Toxicity prediction of 79 compounds with  $\Delta E_{\text{dock}} \leq -9$  kcal/mol and  $\text{Zn}^{2+}$ -ligand binding distances  $\leq 3.5$  Å from word-approved drugs

| ZINC ID              | Molecular structure | $q$ | $\Delta E_{\text{dock}}$ | Toxicity |         |        |         |       |
|----------------------|---------------------|-----|--------------------------|----------|---------|--------|---------|-------|
|                      |                     |     |                          | dili     | carcino | immuno | mutagen | cyto  |
| ZINC0001<br>64760756 |                     | -1  | -10.6                    | N(54)    | N(59)   | Y(92)  | N(66)   | N(52) |
| ZINC0000<br>03927200 |                     | 0   | -10.4                    | N(79)    | Y(66)   | Y(89)  | N(95)   | N(83) |
| ZINC0000<br>60392779 |                     | 0   | -10.2                    | Y(86)    | N(62)   | Y(99)  | N(56)   | N(75) |
| ZINC0000<br>12503149 |                     | 0   | -10.2                    | Y(85)    | Y(58)   | Y(67)  | Y(61)   | N(89) |
| ZINC0001<br>00030989 |                     | 0   | -10.2                    | Y(85)    | Y(58)   | Y(67)  | Y(61)   | N(89) |
| ZINC0001<br>47175374 |                     | 0   | -10.2                    | Y(85)    | Y(58)   | Y(67)  | Y(61)   | N(89) |
| ZINC0000<br>95618351 |                     | 0   | -10.1                    | N(70)    | Y(53)   | N(88)  | Y(69)   | N(58) |
| ZINC0000<br>03932831 |                     | 0   | -10.1                    | N(92)    | N(60)   | Y(99)  | N(64)   | N(77) |

|                      |  |    |      |       |       |       |       |       |
|----------------------|--|----|------|-------|-------|-------|-------|-------|
| ZINC0001<br>00067477 |  | -1 | -10  | Y(85) | N(51) | N(57) | N(55) | N(70) |
| ZINC0001<br>00067477 |  | 0  | -10  | Y(85) | N(51) | N(57) | N(55) | N(70) |
| ZINC0000<br>11679756 |  | -3 | -10  | Y(67) | N(57) | N(72) | N(56) | N(84) |
| ZINC0000<br>11679756 |  | -2 | -10  | Y(67) | N(57) | N(72) | N(56) | N(84) |
| ZINC0000<br>14880001 |  | 0  | -10  | N(92) | N(60) | Y(99) | N(64) | N(77) |
| ZINC0000<br>95618741 |  | 0  | -9.9 | Y(67) | Y(55) | N(98) | N(70) | N(66) |
| ZINC0000<br>11681563 |  | 0  | -9.9 | N(66) | N(71) | N(78) | N(73) | N(64) |
| ZINC0000<br>11681563 |  | 1  | -9.9 | N(66) | N(71) | N(78) | N(73) | N(64) |
| ZINC0009<br>36069565 |  | 0  | -9.9 | Y(56) | N(58) | Y(96) | N(64) | N(50) |
| ZINC0000<br>04217252 |  | 0  | -9.9 | N(94) | N(59) | Y(85) | N(83) | N(76) |
| ZINC0000<br>04217252 |  | 1  | -9.9 | N(94) | N(59) | Y(85) | N(83) | N(76) |
| ZINC0000<br>00601301 |  | 0  | -9.8 | N(82) | N(71) | N(89) | N(84) | N(73) |
| ZINC0002<br>05224698 |  | 1  | -9.8 | N(66) | N(58) | N(53) | N(55) | N(61) |
| ZINC0000<br>04175630 |  | 0  | -9.8 | N(78) | N(69) | Y(89) | N(86) | N(65) |
| ZINC0000<br>00538337 |  | 0  | -9.8 | N(75) | N(67) | Y(77) | N(56) | N(67) |
| ZINC0000<br>00538337 |  | 1  | -9.8 | N(75) | N(67) | Y(77) | N(56) | N(67) |

|                      |                                                                                     |    |      |       |       |       |       |       |
|----------------------|-------------------------------------------------------------------------------------|----|------|-------|-------|-------|-------|-------|
| ZINC0000<br>06716957 |    | 1  | -9.7 | Y(82) | Y(53) | Y(98) | N(59) | N(72) |
| ZINC0000<br>27990463 |    | 1  | -9.7 | N(78) | N(61) | N(70) | N(58) | N(77) |
| ZINC0000<br>00537755 |    | 1  | -9.7 | N(74) | N(57) | Y(73) | N(69) | N(74) |
| ZINC0000<br>04175630 |    | 1  | -9.7 | N(78) | N(69) | Y(89) | N(86) | N(65) |
| ZINC0000<br>85599303 |    | 0  | -9.7 | N(83) | N(50) | Y(99) | N(73) | N(71) |
| ZINC0000<br>95618739 |    | 0  | -9.6 | Y(71) | Y(51) | N(96) | N(82) | N(74) |
| ZINC0006<br>85933136 |   | 1  | -9.6 | N(55) | Y(52) | Y(80) | N(51) | N(63) |
| ZINC0000<br>21981256 |  | 1  | -9.6 | N(83) | N(66) | N(96) | N(61) | N(59) |
| ZINC0000<br>03816514 |  | 0  | -9.6 | N(83) | N(66) | N(93) | N(67) | N(75) |
| ZINC0000<br>03816514 |  | 1  | -9.6 | N(83) | N(66) | N(93) | N(67) | N(75) |
| ZINC0002<br>61494552 |  | -1 | -9.6 | N(56) | N(68) | Y(82) | N(57) | N(65) |
| ZINC0000<br>06716957 |  | 0  | -9.5 | Y(82) | Y(53) | Y(98) | N(59) | N(72) |
| ZINC0000<br>95618742 |  | 0  | -9.5 | Y(67) | Y(55) | N(98) | N(70) | N(66) |
| ZINC0000<br>11617039 |  | 0  | -9.5 | N(65) | Y(66) | Y(85) | N(70) | Y(50) |
| ZINC0000<br>22034381 |  | 0  | -9.5 | N(79) | N(70) | N(97) | N(78) | N(67) |
| ZINC0000<br>95618852 |  | -1 | -9.5 | N(83) | Y(61) | Y(99) | N(76) | N(74) |

|                      |                                                                                     |    |      |       |       |       |       |       |
|----------------------|-------------------------------------------------------------------------------------|----|------|-------|-------|-------|-------|-------|
| ZINC0000<br>40165218 | 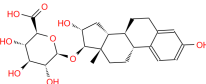   | -1 | -9.5 | N(85) | N(66) | Y(99) | N(81) | N(64) |
| ZINC0002<br>61494710 |    | -1 | -9.5 | N(71) | N(77) | Y(82) | N(62) | N(78) |
| ZINC0002<br>57459143 |    | 0  | -9.5 | N(58) | N(50) | Y(97) | N(71) | N(82) |
| ZINC0000<br>53073961 |    | 1  | -9.4 | N(78) | N(55) | Y(98) | N(65) | N(70) |
| ZINC0001<br>50338819 |    | 0  | -9.4 | N(63) | N(63) | Y(83) | N(67) | N(56) |
| ZINC0000<br>00020243 |    | -1 | -9.4 | Y(75) | N(65) | N(97) | N(85) | N(60) |
| ZINC0001<br>00048501 |    | -4 | -9.4 | Y(51) | N(65) | N(99) | N(82) | N(66) |
| ZINC0000<br>03881958 |    | 0  | -9.4 | Y(73) | N(60) | Y(78) | N(66) | N(76) |
| ZINC0000<br>31417974 |  | -1 | -9.3 | N(71) | N(68) | N(85) | N(85) | N(82) |
| ZINC0002<br>61494712 |  | -1 | -9.3 | N(73) | N(78) | Y(99) | N(63) | N(75) |
| ZINC0000<br>31622970 |  | 0  | -9.3 | N(70) | N(61) | Y(73) | N(89) | N(83) |
| ZINC0000<br>03873362 |  | 0  | -9.3 | N(53) | N(52) | Y(96) | N(67) | N(75) |
| ZINC0001<br>00051684 |  | 0  | -9.3 | N(79) | N(67) | Y(66) | N(81) | N(89) |
| ZINC0000<br>95862733 |  | 0  | -9.3 | N(96) | N(62) | Y(99) | N(93) | Y(59) |
| ZINC0001<br>00015190 |  | -1 | -9.2 | Y(51) | N(50) | N(95) | Y(85) | N(65) |
| ZINC0000<br>00601275 |  | 0  | -9.2 | Y(60) | Y(58) | N(52) | N(58) | N(70) |
| ZINC0000<br>02570882 |  | 0  | -9.2 | N(52) | N(67) | N(97) | N(74) | N(70) |

|                      |                                                                                     |    |      |       |       |       |       |       |
|----------------------|-------------------------------------------------------------------------------------|----|------|-------|-------|-------|-------|-------|
| ZINC0000<br>04311748 | 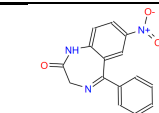   | 0  | -9.2 | N(50) | Y(61) | N(99) | N(65) | N(55) |
| ZINC0000<br>00607726 |    | 0  | -9.2 | N(89) | N(76) | N(88) | N(92) | N(81) |
| ZINC0000<br>22034381 |    | 1  | -9.2 | N(79) | N(70) | N(97) | N(78) | N(67) |
| ZINC0000<br>01539579 |    | -1 | -9.2 | Y(80) | N(66) | N(99) | N(69) | N(79) |
| ZINC0000<br>95618879 |    | 0  | -9.2 | Y(60) | Y(53) | N(70) | N(67) | N(79) |
| ZINC0001<br>18915338 |    | 0  | -9.2 | N(58) | N(51) | Y(53) | N(60) | N(71) |
| ZINC0000<br>04026419 |    | 0  | -9.2 | Y(68) | Y(50) | Y(92) | N(92) | N(74) |
| ZINC0000<br>03873364 |   | 0  | -9.2 | N(53) | N(52) | Y(96) | N(67) | N(75) |
| ZINC0000<br>04215629 |  | 0  | -9.2 | Y(52) | N(72) | Y(61) | N(89) | N(81) |
| ZINC0000<br>00538152 |  | -2 | -9.1 | N(75) | N(71) | N(99) | N(62) | N(90) |
| ZINC0002<br>04073689 |  | 0  | -9.1 | N(62) | N(55) | Y(99) | N(58) | N(60) |
| ZINC0000<br>02017901 |  | 0  | -9.1 | Y(57) | Y(52) | N(99) | N(59) | N(69) |
| ZINC0000<br>00601254 |  | 0  | -9.1 | N(65) | N(64) | N(73) | N(85) | Y(52) |
| ZINC0001<br>00053593 |  | 0  | -9.1 | N(71) | N(55) | N(82) | N(64) | N(51) |
| ZINC0000<br>43131420 |  | -2 | -9.1 | N(55) | N(65) | Y(99) | N(65) | N(61) |
| ZINC0000<br>85537142 |  | 0  | -9.1 | N(71) | N(71) | Y(99) | Y(89) | N(57) |

|                      |                                                                                   |    |      |       |       |       |       |       |
|----------------------|-----------------------------------------------------------------------------------|----|------|-------|-------|-------|-------|-------|
| ZINC0000<br>85537142 | 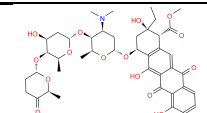 | 0  | -9.1 | N(71) | N(71) | Y(99) | Y(89) | N(57) |
| ZINC0000<br>33963989 |  | 0  | -9.1 | N(70) | N(61) | Y(73) | N(89) | N(83) |
| ZINC0000<br>03875469 |  | 0  | -9.1 | Y(67) | N(56) | Y(97) | N(98) | N(89) |
| ZINC0002<br>61494708 |  | -1 | -9.1 | N(70) | N(76) | Y(98) | N(62) | N(78) |
| ZINC0001<br>00036907 |  | 0  | -9.1 | N(91) | N(74) | N(91) | N(88) | N(73) |
| ZINC0002<br>42548690 |  | 0  | -9.1 | N(98) | N(67) | Y(99) | N(59) | Y(59) |



**Table S3.** Energy decomposition (kcal/mol) of identified key residues for binding with 84Z

| Residue | $\Delta E_{\text{vdW}}$ | $\Delta E_{\text{elec}}$ | $\Delta E_{\text{MM}}$ | $\Delta G_{\text{sol}}$ | $\Delta E_{\text{bind}}$ |
|---------|-------------------------|--------------------------|------------------------|-------------------------|--------------------------|
| HIS-64  | -0.1 $\pm$ -0.0         | 0.3 $\pm$ -0.1           | 0.3 $\pm$ -0.1         | -0.4 $\pm$ -0.1         | -0.1 $\pm$ -0.1          |
| HIS-67  | -0.1 $\pm$ -0.1         | -0.1 $\pm$ -0.1          | -0.2 $\pm$ -0.1        | 0.1 $\pm$ -0.1          | -0.1 $\pm$ -0.1          |
| GLN-92  | -1.2 $\pm$ -0.3         | 0.6 $\pm$ -0.8           | -0.6 $\pm$ -0.9        | -1.1 $\pm$ -0.8         | -1.7 $\pm$ -0.8          |
| HIS-94  | -1.3 $\pm$ -0.3         | 1.6 $\pm$ -0.8           | 0.3 $\pm$ -0.8         | -2.1 $\pm$ -0.9         | -1.8 $\pm$ -0.9          |
| HIS-96  | -0.2 $\pm$ -0.0         | 1.5 $\pm$ -0.2           | 1.3 $\pm$ -0.2         | -2.5 $\pm$ -0.4         | -1.3 $\pm$ -0.5          |
| GLU-106 | -0.3 $\pm$ -0.1         | 1.7 $\pm$ -1.1           | 1.3 $\pm$ -1.1         | 0.8 $\pm$ -1.9          | 2.2 $\pm$ -1.9           |
| HIS-107 | -0.1 $\pm$ -0.0         | -1.9 $\pm$ -0.4          | -2.0 $\pm$ -0.4        | 1.3 $\pm$ -0.5          | -0.7 $\pm$ -0.5          |
| GLU-117 | -0.0 $\pm$ -0.0         | 1.9 $\pm$ -0.3           | 1.9 $\pm$ -0.3         | -1.9 $\pm$ -0.4         | 0.0 $\pm$ -0.4           |
| HIS-119 | -0.9 $\pm$ -0.3         | 3.1 $\pm$ -0.6           | 2.1 $\pm$ -0.8         | -3.6 $\pm$ -1.1         | -1.5 $\pm$ -1.3          |
| ALA-121 | -0.9 $\pm$ -0.2         | -0.6 $\pm$ -0.2          | -1.5 $\pm$ -0.3        | 0.9 $\pm$ -0.4          | -0.5 $\pm$ -0.4          |
| HIS-122 | -0.2 $\pm$ -0.1         | -1.9 $\pm$ -0.3          | -2.1 $\pm$ -0.3        | 3.1 $\pm$ -0.8          | 1.0 $\pm$ -0.7           |
| LEU-131 | -0.3 $\pm$ -0.2         | -0.1 $\pm$ -0.1          | -0.4 $\pm$ -0.3        | 0.1 $\pm$ -0.1          | -0.3 $\pm$ -0.2          |
| ALA-132 | -0.0 $\pm$ -0.0         | -0.1 $\pm$ -0.0          | -0.1 $\pm$ -0.0        | 0.1 $\pm$ -0.0          | -0.0 $\pm$ -0.0          |
| ALA-135 | -0.3 $\pm$ -0.2         | -0.2 $\pm$ -0.2          | -0.6 $\pm$ -0.3        | 0.4 $\pm$ -0.4          | -0.1 $\pm$ -0.2          |
| LEU-141 | -1.3 $\pm$ -0.4         | -0.5 $\pm$ -0.3          | -1.8 $\pm$ -0.6        | 0.8 $\pm$ -0.4          | -1.0 $\pm$ -0.4          |
| VAL-143 | -1.3 $\pm$ -0.5         | -0.1 $\pm$ -0.1          | -1.4 $\pm$ -0.4        | 0.5 $\pm$ -0.1          | -0.9 $\pm$ -0.5          |
| LEU-198 | -2.2 $\pm$ -0.4         | -0.0 $\pm$ -0.2          | -2.3 $\pm$ -0.5        | 0.5 $\pm$ -0.2          | -1.8 $\pm$ -0.5          |
| THR-199 | -0.5 $\pm$ -0.5         | -3.5 $\pm$ -0.9          | -4.0 $\pm$ -0.7        | 1.3 $\pm$ -0.4          | -2.7 $\pm$ -0.6          |
| HIS-200 | -1.3 $\pm$ -0.7         | -3.5 $\pm$ -1.5          | -4.8 $\pm$ -1.2        | 2.4 $\pm$ -0.6          | -2.3 $\pm$ -1.3          |
| PRO-201 | -0.1 $\pm$ -0.0         | -0.4 $\pm$ -0.1          | -0.5 $\pm$ -0.1        | 0.3 $\pm$ -0.1          | -0.1 $\pm$ -0.1          |
| PRO-202 | -0.2 $\pm$ -0.1         | 0.2 $\pm$ -0.1           | 0.0 $\pm$ -0.1         | -0.1 $\pm$ -0.0         | -0.1 $\pm$ -0.1          |
| TRP-209 | -0.8 $\pm$ -0.3         | -1.8 $\pm$ -1.1          | -2.7 $\pm$ -1.1        | 1.1 $\pm$ -0.5          | -1.5 $\pm$ -0.8          |
| ZN-261  | 0.9 $\pm$ -0.6          | -20.3 $\pm$ -2.8         | -19.4 $\pm$ -2.4       | 38.7 $\pm$ -5.2         | 19.3 $\pm$ -5.7          |

**Table S4.** Energy decomposition (kcal/mol) of identified key residues for binding with cyclothiazide

| Residue | $\Delta E_{\text{vdW}}$ | $\Delta E_{\text{elec}}$ | $\Delta E_{\text{MM}}$ | $\Delta G_{\text{sol}}$ | $\Delta E_{\text{bind}}$ |
|---------|-------------------------|--------------------------|------------------------|-------------------------|--------------------------|
| HIS-64  | $-0.8 \pm -0.4$         | $-0.6 \pm -1.6$          | $-1.4 \pm -1.6$        | $0.9 \pm -1.0$          | $-0.5 \pm -0.8$          |
| HIS-67  | $-1.5 \pm -0.5$         | $-0.6 \pm -0.9$          | $-2.2 \pm -1.2$        | $1.0 \pm -0.7$          | $-1.2 \pm -1.1$          |
| GLN-92  | $-1.5 \pm -0.5$         | $-0.3 \pm -1.0$          | $-1.8 \pm -1.0$        | $0.0 \pm -0.7$          | $-1.8 \pm -0.8$          |
| HIS-94  | $-2.0 \pm -0.4$         | $1.5 \pm -0.8$           | $-0.5 \pm -1.0$        | $-2.5 \pm -1.4$         | $-3.0 \pm -1.7$          |
| HIS-96  | $-0.3 \pm -0.0$         | $1.3 \pm -0.3$           | $1.1 \pm -0.3$         | $-3.4 \pm -1.3$         | $-2.3 \pm -1.3$          |
| GLU-106 | $-0.1 \pm -0.0$         | $3.0 \pm -0.5$           | $2.9 \pm -0.5$         | $-4.2 \pm -1.1$         | $-1.3 \pm -1.1$          |
| HIS-107 | $-0.0 \pm -0.0$         | $-2.2 \pm -0.2$          | $-2.2 \pm -0.2$        | $2.5 \pm -0.5$          | $0.3 \pm -0.5$           |
| GLU-117 | $-0.0 \pm -0.0$         | $2.2 \pm -0.2$           | $2.2 \pm -0.2$         | $-2.9 \pm -0.5$         | $-0.7 \pm -0.5$          |
| HIS-119 | $-0.7 \pm -0.1$         | $3.2 \pm -0.6$           | $2.5 \pm -0.6$         | $-5.5 \pm -1.1$         | $-3.0 \pm -1.1$          |
| ALA-121 | $-0.4 \pm -0.1$         | $-0.1 \pm -0.1$          | $-0.5 \pm -0.1$        | $0.4 \pm -0.1$          | $-0.1 \pm -0.1$          |
| HIS-122 | $-0.1 \pm -0.0$         | $-0.1 \pm -0.3$          | $-0.2 \pm -0.3$        | $0.6 \pm -0.3$          | $0.4 \pm -0.2$           |
| LEU-131 | $-0.1 \pm -0.0$         | $0.1 \pm -0.1$           | $-0.0 \pm -0.1$        | $-0.1 \pm -0.1$         | $-0.1 \pm -0.0$          |
| ALA-132 | $-0.0 \pm -0.0$         | $-0.0 \pm -0.0$          | $-0.0 \pm -0.0$        | $0.0 \pm -0.0$          | $-0.0 \pm -0.0$          |
| ALA-135 | $-0.1 \pm -0.0$         | $0.2 \pm -0.1$           | $0.1 \pm -0.1$         | $-0.2 \pm -0.1$         | $-0.1 \pm -0.1$          |
| LEU-141 | $-0.4 \pm -0.1$         | $0.1 \pm -0.1$           | $-0.4 \pm -0.1$        | $0.2 \pm -0.1$          | $-0.2 \pm -0.1$          |
| VAL-143 | $-0.7 \pm -0.2$         | $-0.2 \pm -0.1$          | $-0.9 \pm -0.2$        | $0.3 \pm -0.1$          | $-0.6 \pm -0.2$          |
| LEU-198 | $-1.8 \pm -0.3$         | $-0.4 \pm -0.3$          | $-2.2 \pm -0.5$        | $0.3 \pm -0.2$          | $-1.9 \pm -0.5$          |
| THR-199 | $-0.7 \pm -0.3$         | $-2.0 \pm -0.9$          | $-2.7 \pm -0.7$        | $0.7 \pm -0.5$          | $-2.0 \pm -0.7$          |
| HIS-200 | $-2.1 \pm -0.6$         | $-4.2 \pm -0.7$          | $-6.4 \pm -0.7$        | $4.2 \pm -0.5$          | $-2.2 \pm -0.8$          |
| PRO-201 | $-0.4 \pm -0.1$         | $-0.5 \pm -0.2$          | $-0.9 \pm -0.2$        | $0.9 \pm -0.3$          | $0.0 \pm -0.2$           |
| PRO-202 | $-0.4 \pm -0.1$         | $0.2 \pm -0.1$           | $-0.2 \pm -0.1$        | $-0.1 \pm -0.1$         | $-0.3 \pm -0.1$          |
| TRP-209 | $-0.8 \pm -0.2$         | $0.1 \pm -0.3$           | $-0.8 \pm -0.3$        | $0.5 \pm -0.1$          | $-0.3 \pm -0.3$          |
| ZN-261  | $0.4 \pm -0.5$          | $-20.4 \pm -3.6$         | $-19.9 \pm -3.2$       | $46.9 \pm -10.7$        | $26.9 \pm -10.1$         |

**Table S5.** Energy decomposition (kcal/mol) of identified key residues for binding with 3UG

| Residue | $\Delta E_{\text{vdW}}$ | $\Delta E_{\text{elec}}$ | $\Delta E_{\text{MM}}$ | $\Delta G_{\text{sol}}$ | $\Delta E_{\text{bind}}$ |
|---------|-------------------------|--------------------------|------------------------|-------------------------|--------------------------|
| HIS-64  | -0.1 $\pm$ -0.0         | 0.6 $\pm$ -0.1           | 0.5 $\pm$ -0.1         | -0.7 $\pm$ -0.1         | -0.2 $\pm$ -0.1          |
| HIS-67  | -0.1 $\pm$ -0.0         | -0.1 $\pm$ -0.1          | -0.2 $\pm$ -0.1        | 0.2 $\pm$ -0.1          | -0.0 $\pm$ -0.1          |
| GLN-92  | -0.9 $\pm$ -0.3         | 1.5 $\pm$ -0.5           | 0.5 $\pm$ -0.5         | -1.5 $\pm$ -0.6         | -1.0 $\pm$ -0.4          |
| HIS-94  | -0.2 $\pm$ -0.5         | 5.4 $\pm$ -1.2           | 5.2 $\pm$ -1.3         | -7.3 $\pm$ -1.1         | -2.1 $\pm$ -1.3          |
| HIS-96  | -0.5 $\pm$ -0.1         | 4.5 $\pm$ -0.6           | 3.9 $\pm$ -0.6         | -7.1 $\pm$ -0.7         | -3.1 $\pm$ -0.6          |
| GLU-106 | -0.1 $\pm$ -0.0         | 5.0 $\pm$ -0.6           | 4.9 $\pm$ -0.5         | -6.4 $\pm$ -0.8         | -1.6 $\pm$ -0.8          |
| HIS-107 | -0.0 $\pm$ -0.0         | -2.9 $\pm$ -0.2          | -2.9 $\pm$ -0.2        | 4.3 $\pm$ -0.4          | 1.3 $\pm$ -0.4           |
| GLU-117 | -0.0 $\pm$ -0.0         | 3.1 $\pm$ -0.2           | 3.0 $\pm$ -0.2         | -4.7 $\pm$ -0.4         | -1.6 $\pm$ -0.4          |
| HIS-119 | -0.8 $\pm$ -0.1         | 5.3 $\pm$ -0.7           | 4.5 $\pm$ -0.8         | -8.4 $\pm$ -0.7         | -3.9 $\pm$ -0.7          |
| ALA-121 | -0.4 $\pm$ -0.1         | -0.1 $\pm$ -0.0          | -0.5 $\pm$ -0.1        | 0.7 $\pm$ -0.3          | 0.2 $\pm$ -0.2           |
| HIS-122 | -0.1 $\pm$ -0.0         | -0.4 $\pm$ -0.2          | -0.4 $\pm$ -0.2        | 1.5 $\pm$ -0.6          | 1.1 $\pm$ -0.5           |
| LEU-131 | -0.6 $\pm$ -0.3         | -0.0 $\pm$ -0.1          | -0.7 $\pm$ -0.2        | -0.0 $\pm$ -0.2         | -0.7 $\pm$ -0.3          |
| ALA-132 | -0.1 $\pm$ -0.0         | -0.1 $\pm$ -0.0          | -0.1 $\pm$ -0.0        | 0.0 $\pm$ -0.0          | -0.1 $\pm$ -0.0          |
| ALA-135 | -0.5 $\pm$ -0.2         | 0.1 $\pm$ -0.1           | -0.4 $\pm$ -0.2        | -0.3 $\pm$ -0.2         | -0.7 $\pm$ -0.3          |
| LEU-141 | -0.8 $\pm$ -0.2         | 0.1 $\pm$ -0.1           | -0.7 $\pm$ -0.2        | 0.6 $\pm$ -0.2          | -0.2 $\pm$ -0.3          |
| VAL-143 | -0.6 $\pm$ -0.1         | -0.3 $\pm$ -0.1          | -0.8 $\pm$ -0.2        | 0.5 $\pm$ -0.1          | -0.4 $\pm$ -0.2          |
| LEU-198 | -2.0 $\pm$ -0.5         | -0.8 $\pm$ -0.2          | -2.9 $\pm$ -0.5        | 1.4 $\pm$ -0.2          | -1.5 $\pm$ -0.5          |
| THR-199 | -0.8 $\pm$ -0.1         | -0.6 $\pm$ -0.4          | -1.4 $\pm$ -0.4        | 1.5 $\pm$ -0.3          | 0.1 $\pm$ -0.4           |
| HIS-200 | -0.8 $\pm$ -0.7         | -3.4 $\pm$ -0.9          | -4.2 $\pm$ -0.7        | 2.2 $\pm$ -0.6          | -2.1 $\pm$ -0.6          |
| PRO-201 | -0.3 $\pm$ -0.1         | -0.1 $\pm$ -0.1          | -0.4 $\pm$ -0.1        | 0.8 $\pm$ -0.3          | 0.3 $\pm$ -0.3           |
| PRO-202 | -0.7 $\pm$ -0.3         | 0.1 $\pm$ -0.1           | -0.6 $\pm$ -0.3        | 0.2 $\pm$ -0.1          | -0.4 $\pm$ -0.3          |
| TRP-209 | -0.6 $\pm$ -0.2         | -0.5 $\pm$ -0.1          | -1.1 $\pm$ -0.2        | 0.6 $\pm$ -0.1          | -0.4 $\pm$ -0.2          |
| ZN-261  | 1.8 $\pm$ -0.8          | -45.8 $\pm$ -4.3         | -44.0 $\pm$ -3.8       | 77.0 $\pm$ -4.7         | 33.0 $\pm$ -5.0          |

**Table S6.** Energy decomposition (kcal/mol) of identified key residues for binding with ketoprofen glucuronide

| Residue | $\Delta E_{\text{vdW}}$ | $\Delta E_{\text{elec}}$ | $\Delta E_{\text{MM}}$ | $\Delta G_{\text{sol}}$ | $\Delta E_{\text{bind}}$ |
|---------|-------------------------|--------------------------|------------------------|-------------------------|--------------------------|
| HIS-64  | -0.2 ± -0.1             | -1.6 ± -0.3              | -1.8 ± -0.3            | 1.4 ± -0.3              | -0.4 ± -0.1              |
| HIS-67  | -0.2 ± -0.0             | 0.1 ± -0.5               | -0.1 ± -0.5            | -0.0 ± -0.4             | -0.1 ± -0.2              |
| GLN-92  | -1.4 ± -0.2             | 1.0 ± -0.7               | -0.4 ± -0.6            | -0.3 ± -0.7             | -0.8 ± -0.4              |
| HIS-94  | -0.5 ± -0.4             | 11.0 ± -1.0              | 10.5 ± -1.2            | -9.5 ± -1.0             | 1.0 ± -1.1               |
| HIS-96  | -0.3 ± -0.0             | 8.4 ± -0.4               | 8.2 ± -0.4             | -9.6 ± -0.9             | -1.4 ± -0.8              |
| GLU-106 | -0.1 ± -0.0             | 24.6 ± -0.9              | 24.6 ± -0.9            | -21.9 ± -1.0            | 2.6 ± -1.0               |
| HIS-107 | -0.0 ± -0.0             | -18.9 ± -0.6             | -18.9 ± -0.6           | 17.1 ± -0.7             | -1.7 ± -0.5              |
| GLU-117 | -0.0 ± -0.0             | 19.5 ± -0.5              | 19.5 ± -0.5            | -18.0 ± -0.7            | 1.5 ± -0.5               |
| HIS-119 | -0.7 ± -0.1             | 11.9 ± -1.2              | 11.2 ± -1.3            | -11.2 ± -1.0            | -0.0 ± -1.1              |
| ALA-121 | -1.2 ± -0.2             | -1.6 ± -0.2              | -2.8 ± -0.4            | 1.6 ± -0.4              | -1.2 ± -0.4              |
| HIS-122 | -0.5 ± -0.1             | -14.7 ± -0.5             | -15.2 ± -0.5           | 16.3 ± -0.7             | 1.1 ± -0.6               |
| LEU-131 | -2.0 ± -0.3             | 0.5 ± -0.1               | -1.4 ± -0.3            | -0.2 ± -0.3             | -1.6 ± -0.4              |
| ALA-132 | -0.7 ± -0.2             | 0.4 ± -0.1               | -0.3 ± -0.3            | -0.2 ± -0.1             | -0.6 ± -0.3              |
| ALA-135 | -1.1 ± -0.2             | 0.8 ± -0.2               | -0.3 ± -0.2            | -0.5 ± -0.1             | -0.8 ± -0.2              |
| LEU-141 | -1.1 ± -0.2             | -1.2 ± -0.2              | -2.4 ± -0.3            | 0.9 ± -0.2              | -1.4 ± -0.3              |
| VAL-143 | -0.6 ± -0.1             | -1.5 ± -0.3              | -2.1 ± -0.3            | 1.3 ± -0.2              | -0.8 ± -0.2              |
| LEU-198 | -1.8 ± -0.3             | -3.2 ± -0.3              | -5.0 ± -0.5            | 2.8 ± -0.2              | -2.2 ± -0.5              |
| THR-199 | -0.3 ± -0.1             | -1.0 ± -0.5              | -1.4 ± -0.5            | 2.1 ± -0.4              | 0.7 ± -0.4               |
| HIS-200 | -1.2 ± -0.5             | 2.4 ± -1.1               | 1.1 ± -1.0             | -0.3 ± -0.5             | 0.8 ± -0.8               |
| PRO-201 | -0.3 ± -0.1             | 1.1 ± -0.4               | 0.8 ± -0.4             | -0.4 ± -0.4             | 0.4 ± -0.3               |
| PRO-202 | -0.8 ± -0.2             | -0.9 ± -0.2              | -1.7 ± -0.4            | 0.7 ± -0.2              | -1.0 ± -0.3              |
| TRP-209 | -0.6 ± -0.1             | -0.9 ± -0.5              | -1.4 ± -0.5            | 1.1 ± -0.3              | -0.3 ± -0.3              |
| ZN-261  | 2.8 ± -1.0              | -124.1 ± -3.8            | -121.3 ± -3.0          | 131.0 ± -8.0            | 9.8 ± -7.8               |

**Table S7.** Energy decomposition (kcal/mol) of identified key residues for binding with bhft

| Residue | $\Delta E_{vdW}$ | $\Delta E_{elec}$ | $\Delta E_{MM}$  | $\Delta G_{sol}$ | $\Delta E_{bind}$ |
|---------|------------------|-------------------|------------------|------------------|-------------------|
| HIS-64  | -0.1 $\pm$ -0.1  | 0.3 $\pm$ -0.2    | 0.1 $\pm$ -0.2   | -0.3 $\pm$ -0.2  | -0.2 $\pm$ -0.2   |
| HIS-67  | -0.3 $\pm$ -0.1  | 0.3 $\pm$ -0.2    | -0.0 $\pm$ -0.3  | -0.2 $\pm$ -0.5  | -0.3 $\pm$ -0.3   |
| GLN-92  | -1.2 $\pm$ -0.4  | -0.2 $\pm$ -0.7   | -1.4 $\pm$ -0.9  | 1.2 $\pm$ -0.8   | -0.2 $\pm$ -0.7   |
| HIS-94  | -0.6 $\pm$ -0.5  | 8.0 $\pm$ -1.2    | 7.4 $\pm$ -1.3   | -9.7 $\pm$ -1.0  | -2.3 $\pm$ -1.1   |
| HIS-96  | -0.5 $\pm$ -0.1  | 4.4 $\pm$ -0.5    | 3.9 $\pm$ -0.5   | -7.1 $\pm$ -0.7  | -3.2 $\pm$ -0.6   |
| GLU-106 | -0.1 $\pm$ -0.0  | 5.4 $\pm$ -0.6    | 5.3 $\pm$ -0.6   | -6.1 $\pm$ -1.6  | -0.8 $\pm$ -1.7   |
| HIS-107 | -0.0 $\pm$ -0.0  | -3.2 $\pm$ -0.2   | -3.2 $\pm$ -0.2  | 4.1 $\pm$ -0.6   | 0.9 $\pm$ -0.6    |
| GLU-117 | -0.0 $\pm$ -0.0  | 3.5 $\pm$ -0.2    | 3.5 $\pm$ -0.2   | -4.8 $\pm$ -0.6  | -1.4 $\pm$ -0.6   |
| HIS-119 | -1.0 $\pm$ -0.1  | 5.9 $\pm$ -0.7    | 4.9 $\pm$ -0.8   | -8.3 $\pm$ -0.8  | -3.3 $\pm$ -1.0   |
| ALA-121 | -0.3 $\pm$ -0.2  | -0.0 $\pm$ -0.1   | -0.3 $\pm$ -0.2  | 0.3 $\pm$ -0.1   | -0.0 $\pm$ -0.2   |
| HIS-122 | -0.1 $\pm$ -0.0  | 0.1 $\pm$ -0.2    | 0.1 $\pm$ -0.2   | 0.6 $\pm$ -0.3   | 0.7 $\pm$ -0.3    |
| LEU-131 | -1.3 $\pm$ -0.5  | -0.2 $\pm$ -0.4   | -1.5 $\pm$ -0.7  | 0.8 $\pm$ -0.7   | -0.7 $\pm$ -0.5   |
| ALA-132 | -0.8 $\pm$ -0.4  | -0.0 $\pm$ -0.2   | -0.8 $\pm$ -0.4  | 0.1 $\pm$ -0.2   | -0.7 $\pm$ -0.4   |
| ALA-135 | -0.6 $\pm$ -0.2  | 0.5 $\pm$ -0.1    | -0.1 $\pm$ -0.2  | -0.4 $\pm$ -0.2  | -0.6 $\pm$ -0.2   |
| LEU-141 | -0.7 $\pm$ -0.2  | 0.1 $\pm$ -0.1    | -0.6 $\pm$ -0.2  | 0.3 $\pm$ -0.1   | -0.2 $\pm$ -0.2   |
| VAL-143 | -0.6 $\pm$ -0.2  | -0.3 $\pm$ -0.1   | -0.9 $\pm$ -0.2  | 0.6 $\pm$ -0.1   | -0.3 $\pm$ -0.3   |
| LEU-198 | -2.5 $\pm$ -0.3  | -0.8 $\pm$ -0.2   | -3.2 $\pm$ -0.4  | 1.4 $\pm$ -0.3   | -1.8 $\pm$ -0.5   |
| THR-199 | -0.8 $\pm$ -0.1  | -0.0 $\pm$ -0.4   | -0.8 $\pm$ -0.4  | 1.1 $\pm$ -0.3   | 0.3 $\pm$ -0.5    |
| HIS-200 | -1.2 $\pm$ -0.7  | -5.2 $\pm$ -1.0   | -6.5 $\pm$ -0.8  | 4.2 $\pm$ -0.7   | -2.2 $\pm$ -0.8   |
| PRO-201 | -0.4 $\pm$ -0.1  | 0.5 $\pm$ -0.3    | 0.1 $\pm$ -0.3   | 0.6 $\pm$ -0.4   | 0.7 $\pm$ -0.5    |
| PRO-202 | -0.7 $\pm$ -0.2  | 0.0 $\pm$ -0.2    | -0.6 $\pm$ -0.2  | 0.1 $\pm$ -0.1   | -0.5 $\pm$ -0.2   |
| TRP-209 | -0.7 $\pm$ -0.2  | -0.4 $\pm$ -0.1   | -1.1 $\pm$ -0.2  | 0.7 $\pm$ -0.2   | -0.4 $\pm$ -0.2   |
| ZN-261  | 2.2 $\pm$ -1.1   | -51.3 $\pm$ -4.0  | -49.1 $\pm$ -3.3 | 83.9 $\pm$ -5.0  | 34.8 $\pm$ -5.2   |

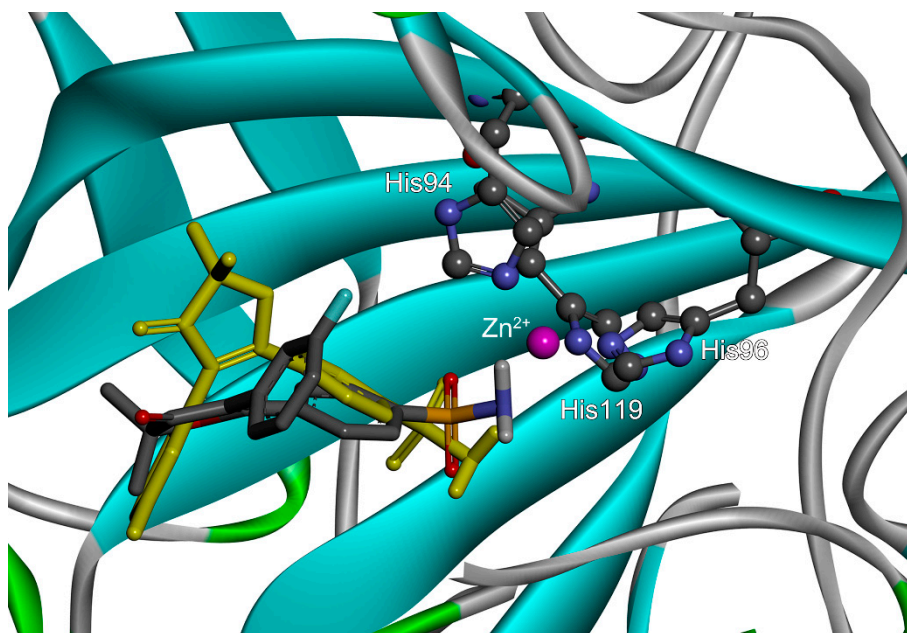

**Figure S1.** Comparison of crystal structure with docking pose for the binding of polmacoxib to hCA I. Crystal structure was taken from PDB database (PDB code: 5GMM). The crystal ligand was colored by element, and the docking pose was in yellow.

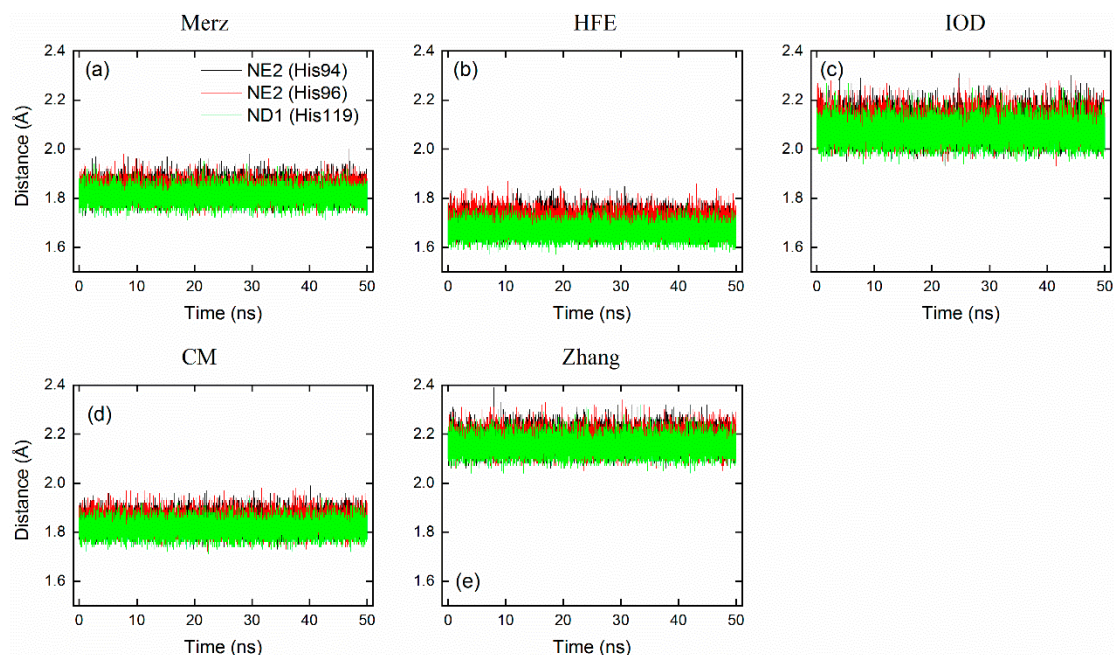

**Figure S2.** Zn<sup>2+</sup>-ligand binding distance as a function of simulation time for ligand-free hCA I using modified Amber ff14SB protein force fields with different ion models (a-e). Refer to Table 3 in the main text for the details of force field parameters. Distances with the NE2 atom (black) of His94, the NE2 atom (red) of His96, and the ND1 atom (green) of His119 were monitored.

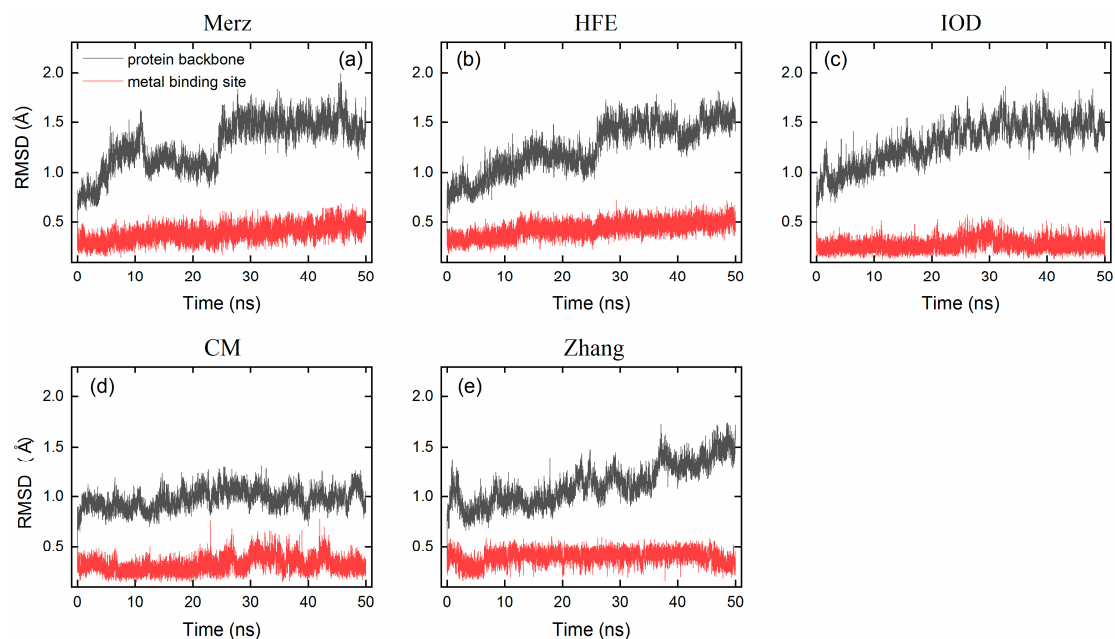

**Figure S3.** RMSD of hCA I protein backbone (black) and metal binding site (red) from crystal structure as a function of simulation time for ligand-free hCA I using modified Amber ff14SB protein force fields with different ion models (a-e). Refer to Table 3 for the details of force field parameters.
